# Supplementary material for: Size dependent cellular uptake, in vivo fate and light–heat conversion efficiency of gold nanoshells on silica nanorattles
Source: Royal Society of Chemistry journal article supplement (doi:10.1039/c2nr30396e), 2012-01-01
Supplement: c2nr30396e.pdf [file c2nr30396e.pdf]

## Supporting Information

### Size dependent cellular uptake, *in vivo* fate and light-heat conversion efficiency of gold nanoshells on silica nanorattles

Huiyu Liu,<sup>a</sup> Tianlong Liu,<sup>a</sup> Linlin Li,<sup>a</sup> Nanjing Hao,<sup>a,b</sup> Longfei Tan,<sup>a</sup> Xianwei Meng,<sup>a</sup> Jun Ren,<sup>a</sup> Dong Chen<sup>a</sup> and Fangqiong Tang\*<sup>a</sup>

<sup>a</sup> Laboratory of Controllable Preparation and Application of Nanomaterials, Technical Institute of Physics and Chemistry, Chinese Academy of Sciences, Beijing 100190 (P. R. China) Fax: (+86-10-82543521); Tel: (+86)10-82543521; E-mail: tangfq@mail.ipc.ac.cn; Homepage: <http://nanocontrol.ipc.ac.cn>  
<sup>b</sup> Graduate University of the Chinese Academy of Sciences, Beijing 100049 (P.R. China)

### Supplementary tables and figures

**Table R1.** Size, PDI and zeta potential of pGSNs with various sizes in water.

| Samples   | Size (PDI)      | Zeta     |
|-----------|-----------------|----------|
| pGSNs-84  | 106.1 nm (0.11) | -6.6 mV  |
| pGSNs-142 | 179.7 nm (0.23) | -3.9 mV  |
| pGSNs-315 | 367.9 nm (0.56) | -11.6 mV |

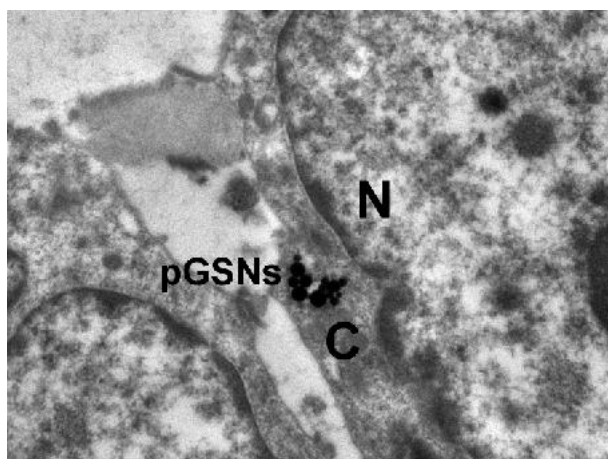

**Fig. S1** The tumor tissue at 24 h after injection of pGSNs-142 (a magnifying image of **Fig. 6A**). Micrograph shows the localization of pGSNs is in cytoplasm. C and N represent cytoplasm and nucleus, respectively.
